# Supplementary material for: 1H NMR as a release methodology for the analysis of phospholipids and other constituents in infant nutrition
Source: Royal Society of Chemistry journal article supplement (doi:10.1039/c6ay02063a), 2016-01-01
Supplement: c6ay02063a1.pdf [file c6ay02063a1.pdf]

**Table S1.** PC, SPH, PE and PI content in investigated samples by  $^1\text{H}$  NMR [w/w %].  $^{31}\text{P}$  NMR was used for confirmation and/or quantification of n.d. (not detected) results.

| Sample | PC    | SPH   | PE    | PI    |
|--------|-------|-------|-------|-------|
| 1      | 0.278 | 0.110 | 0.142 | 0.143 |
| 2      | 0.277 | 0.113 | 0.140 | 0.150 |
| 3      | 0.275 | 0.109 | 0.147 | 0.142 |
| 4      | 0.276 | 0.104 | 0.132 | 0.150 |
| 5      | 0.290 | 0.100 | 0.150 | 0.141 |
| 6      | 0.288 | 0.123 | 0.138 | 0.154 |
| 7      | 0.281 | 0.129 | 0.152 | 0.151 |
| 8      | 0.281 | 0.121 | 0.144 | 0.150 |
| 9      | 0.040 | 0.041 | 0.030 | 0.010 |
| 10     | 0.089 | 0.080 | 0.059 | 0.026 |
| 11     | 0.086 | 0.089 | 0.065 | 0.025 |
| 12     | 0.143 | 0.113 | 0.092 | 0.058 |
| 13     | 0.147 | 0.103 | 0.114 | 0.055 |
| 14     | 0.128 | 0.097 | 0.084 | 0.053 |
| 15     | 0.127 | 0.099 | 0.076 | 0.047 |
| 16     | 0.041 | 0.048 | 0.029 | n.d.  |
| 17     | 0.050 | 0.048 | 0.033 | n.d.  |
| 18     | 0.034 | 0.035 | n.d.  | n.d.  |
| 19     | 0.078 | 0.049 | 0.054 | n.d.  |
| 20     | 0.096 | 0.049 | 0.067 | n.d.  |
| 21     | 0.099 | 0.058 | 0.068 | n.d.  |
| 22     | 0.089 | 0.052 | 0.068 | 0.040 |
| 23     | 0.094 | 0.062 | 0.057 | 0.040 |
| 24     | 0.081 | 0.050 | 0.055 | 0.040 |
| 25     | 0.212 | 0.108 | 0.112 | 0.100 |
| 26     | 0.202 | 0.103 | 0.124 | 0.100 |
| 27     | 0.079 | 0.050 | 0.060 | 0.039 |
| 28     | 0.097 | 0.042 | 0.061 | 0.050 |
| 29     | 0.089 | 0.036 | 0.061 | 0.050 |
| 30     | 0.125 | 0.049 | 0.086 | 0.070 |
| 31     | 0.055 | n.d.  | n.d.  | 0.021 |
| 32     | 0.053 | n.d.  | n.d.  | 0.023 |
| 33     | 0.055 | n.d.  | n.d.  | 0.022 |
| 34     | 0.068 | 0.028 | n.d.  | 0.035 |
| 35     | 0.064 | 0.034 | n.d.  | 0.029 |
| 36     | 0.067 | 0.031 | n.d.  | 0.033 |
| 37     | 0.023 | 0.025 | n.d.  | n.d.  |
